# Supplementary material
Source: PubMed Central journal article supplement (PMC5048746)

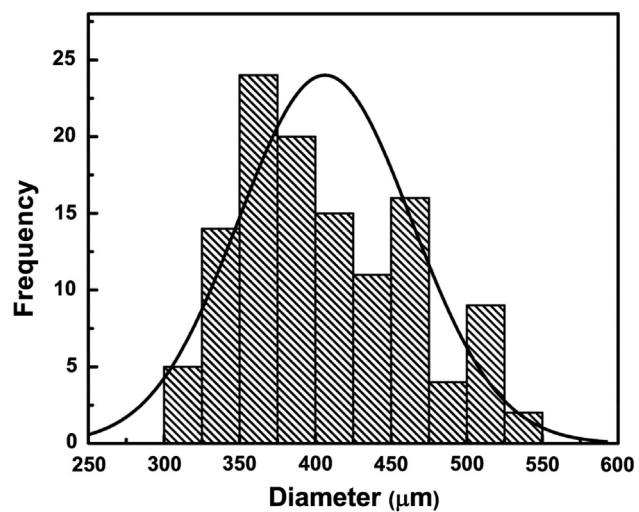

**Figure E1.** Size distribution of 300–500  $\mu\text{m}$  BRMS.

Supplement: NIHMS817708-supplement-supplement_1.pdf [file NIHMS817708-supplement-supplement_1.pdf]
